# Supplementary material
Source: publisher site journal article supplement (https://www.dovepress.com/article/394779)
Supplement: Supplementary file 1 [file get_supplementary_file.php]

| **Supplementary Table S1.** The differences in the genera with r.a.≥0.01% between the two groups | | | | |
| --- | --- | --- | --- | --- |
| Genus | Group H  (n=20) | Group CAP  (n=28) | p-value | q-value |
| Staphylococcus | 12.400665 | 0.218128571 | 0.000514661 | 0.01600597 |
| Neisseria | 5.598075 | 0.912121429 | 0.000339312 | 0.01507517 |
| Rothia | 5.93708 | 0.591371429 | 0.000396176 | 0.015401325 |
| Porphyromonas | 4.04801 | 0.473875 | 0.008319885 | 0.123213537 |
| Moraxella | 2.145 | 0.032882143 | 0.011232411 | 0.139731196 |
| Prevotella_1 | 1.97005 | 0.077003571 | 0.008198147 | 0.123213537 |
| Prevotella_7 | 0.89995 | 0.383046429 | 0.049802989 | 0.442535127 |
| Fusobacterium | 1.099595 | 0.1915 | 0.000242041 | 0.013499829 |
| Lautropia | 0.726955 | 0.153467857 | 0.000260447 | 0.013499829 |
| Prevotella | 0.508125 | 0.239435714 | 0.031824413 | 0.329913085 |
| Peptostreptococcus | 0.507225 | 0.102571429 | 0.001554164 | 0.033436049 |
| Treponema_2 | 0.48216 | 0.016328571 | 5.30E-05 | 0.008239814 |
| Eubacterium_nodatum_group | 0.256015 | 0.070460714 | 0.005807523 | 0.100341097 |
| Filifactor | 0.321045 | 0.014232143 | 0.000133233 | 0.010358895 |
| Gemella | 0.26104 | 0.052310714 | 0.000106254 | 0.010358895 |
| Campylobacter | 0.18955 | 0.084617857 | 0.031394795 | 0.329913085 |
| Ruminiclostridium_6 | 0.03128 | 0.179864286 | 0.038400372 | 0.385164005 |
| Parvimonas | 0.259265 | 0.01515 | 0.000670302 | 0.018951261 |
| Bergeyella | 0.14059 | 0.036632143 | 0.00714428 | 0.11694058 |
| Aggregatibacter | 0.10367 | 0.019825 | 0.003362806 | 0.061519564 |
| Oribacterium | 0.075745 | 0.024378571 | 0.009104164 | 0.128413737 |
| Lachnoanaerobaculum | 0.066195 | 0.026289286 | 0.03058852 | 0.329913085 |
| Ureaplasma | 0.062205 | 0.018117857 | 0.041310428 | 0.389319484 |
| Fretibacterium | 0.06469 | 0.01305 | 0.001275251 | 0.030507932 |
| Catonella | 0.04259 | 0.010792857 | 0.001612671 | 0.033436049 |

Data were presented as means and were analyzed by Welch's t-test. The r.a. was significantly different between the two groups. r.a., relative abundances.

| **Supplementary Table S2**. Significant functional pathways in CAP patients compared to healthy individuals (H) | | | | | | | |
| --- | --- | --- | --- | --- | --- | --- | --- |
| H | CAP | fold(CAP/H) | p-value | significant | Level_1 | Level_2 | Level_3 |
| 106705.892 | 331834.1954 | 3.10980199 | 6.72E-05 | yes | Metabolism | Metabolism of terpenoids and polyketides | Biosynthesis of ansamycins |
| 64399.7075 | 120760.5821 | 1.87517284 | 3.04E-05 | yes | Metabolism | Metabolism of terpenoids and polyketides | Biosynthesis of vancomycin group antibiotics |
| 53119.82641 | 115251.5077 | 2.16965144 | 0.000182979 | yes | Metabolism | Carbohydrate metabolism | Pentose phosphate pathway |
| 72987.70996 | 96251.2014 | 1.31873163 | 0.004725348 | yes | Metabolism | Amino acid metabolism | Valine, leucine and isoleucine biosynthesis |
| 51841.87521 | 109572.2642 | 2.11358605 | 6.33E-05 | yes | Metabolism | Biosynthesis of other secondary metabolites | Streptomycin biosynthesis |
| 63944.84581 | 99089.36657 | 1.54960678 | 0.001233258 | yes | Metabolism | Lipid metabolism | Fatty acid biosynthesis |
| 60805.03209 | 95301.28988 | 1.56732571 | 0.001796345 | yes | Metabolism | Carbohydrate metabolism | C5-Branched dibasic acid metabolism |
| 63692.95693 | 90009.26229 | 1.4131745 | 0.001576218 | yes | Metabolism | Glycan biosynthesis and metabolism | Peptidoglycan biosynthesis |
| 51366.98328 | 95249.25086 | 1.85428937 | 0.000259435 | yes | Metabolism | Energy metabolism | Carbon fixation in photosynthetic organisms |
| 59576.76359 | 81538.50955 | 1.36862939 | 0.002605421 | yes | Metabolism | Metabolism of cofactors and vitamins | Pantothenate and CoA biosynthesis |
| 18459.86238 | 105885.5924 | 5.73599034 | 1.14E-05 | yes | Cellular Processes | Cell motility | Bacterial chemotaxis |
| 54372.66622 | 77966.81687 | 1.43393404 | 0.000395892 | yes | Metabolism | Amino acid metabolism | Alanine, aspartate and glutamate metabolism |
| 59007.17707 | 72186.48701 | 1.22335097 | 0.008201272 | yes | Genetic Information Processing | Replication and repair | Mismatch repair |
| 59362.87893 | 71282.39871 | 1.2007908 | 0.010985156 | yes | Genetic Information Processing | Translation | Aminoacyl-tRNA biosynthesis |
| 56582.5876 | 73102.70414 | 1.29196467 | 0.024027551 | yes | Metabolism | Metabolism of cofactors and vitamins | Biotin metabolism |
| 58359.20722 | 69917.47593 | 1.1980539 | 0.006466902 | yes | Metabolism | Metabolism of cofactors and vitamins | One carbon pool by folate |
| 55663.03045 | 67200.93696 | 1.20728132 | 0.015851119 | yes | Genetic Information Processing | Folding, sorting and degradation | Protein export |
| 51821.70425 | 68468.9055 | 1.32123994 | 0.002053384 | yes | Metabolism | Amino acid metabolism | Lysine biosynthesis |
| 54612.76048 | 66244.99926 | 1.21299489 | 0.013295442 | yes | Genetic Information Processing | Replication and repair | Homologous recombination |
| 46452.16903 | 70357.07825 | 1.51461341 | 0.002907238 | yes | Metabolism | Carbohydrate metabolism | Pyruvate metabolism |
| 45959.01971 | 68448.51494 | 1.48933801 | 0.001924098 | yes | Metabolism | Carbohydrate metabolism | Glycolysis / Gluconeogenesis |
| 49416.33297 | 64911.20933 | 1.31355779 | 0.005193114 | yes | Metabolism | Metabolism of cofactors and vitamins | Thiamine metabolism |
| 27772.47635 | 80155.81173 | 2.88616005 | 0.000217557 | yes | Environmental Information Processing | Membrane transport | ABC transporters |
| 37487.19873 | 73068.38066 | 1.94915553 | 0.000183811 | yes | Metabolism | Metabolism of other amino acids | Selenocompound metabolism |
| 40724.20473 | 68561.13346 | 1.68354751 | 0.0003422 | yes | Metabolism | Amino acid metabolism | Cysteine and methionine metabolism |
| 39097.07759 | 68635.47343 | 1.75551416 | 0.000520303 | yes | Metabolism | Metabolism of cofactors and vitamins | Vitamin B6 metabolism |
| 51832.73822 | 59414.2438 | 1.14626867 | 0.016498957 | yes | Cellular Processes | Cell growth and death | Cell cycle - Caulobacter |
| 42122.93709 | 66192.6366 | 1.57141551 | 0.000430272 | yes | Metabolism | Xenobiotics biodegradation and metabolism | Drug metabolism - other enzymes |
| 42972.49827 | 60427.02779 | 1.40617907 | 0.004993277 | yes | Genetic Information Processing | Folding, sorting and degradation | Sulfur relay system |
| 40143.65059 | 60562.86505 | 1.50865365 | 0.001996584 | yes | Metabolism | Amino acid metabolism | Glycine, serine and threonine metabolism |
| 30818.69538 | 65441.31939 | 2.12342926 | 0.000251297 | yes | Environmental Information Processing | Membrane transport | Bacterial secretion system |
| 38909.63774 | 57045.24147 | 1.46609541 | 0.001766494 | yes | Metabolism | Amino acid metabolism | Phenylalanine, tyrosine and tryptophan biosynthesis |
| 38026.54678 | 57176.16341 | 1.50358548 | 0.00092726 | yes | Metabolism | Metabolism of cofactors and vitamins | Nicotinate and nicotinamide metabolism |
| 45211.17065 | 51977.15938 | 1.14965303 | 0.039667397 | yes | Genetic Information Processing | Replication and repair | DNA replication |
| 28191.63223 | 63168.49354 | 2.24068238 | 0.00028266 | yes | Metabolism | Metabolism of other amino acids | Glutathione metabolism |
| 39186.21594 | 54981.08039 | 1.40307195 | 0.000678972 | yes | Metabolism | Carbohydrate metabolism | Amino sugar and nucleotide sugar metabolism |
| 42310.45724 | 52663.56626 | 1.24469386 | 0.007032866 | yes | Metabolism | Nucleotide metabolism | Pyrimidine metabolism |
| 35078.99217 | 57531.6007 | 1.64005854 | 0.001410781 | yes | Metabolism | Glycan biosynthesis and metabolism | Lipopolysaccharide biosynthesis |
| 42262.10108 | 52154.19491 | 1.23406536 | 0.015283256 | yes | Metabolism | Energy metabolism | Carbon fixation pathways in prokaryotes |
| 38352.89598 | 54774.72054 | 1.42817691 | 0.003806503 | yes | Metabolism | Amino acid metabolism | Histidine metabolism |
| 33639.68283 | 58135.42703 | 1.72818 | 0.000284887 | yes | Metabolism | Carbohydrate metabolism | Fructose and mannose metabolism |
| 41408.93681 | 50655.47998 | 1.22329825 | 0.037427924 | yes | Metabolism | Carbohydrate metabolism | Citrate cycle (TCA cycle) |
| 30870.1981 | 57865.81919 | 1.87448811 | 0.000369554 | yes | Metabolism | Energy metabolism | Sulfur metabolism |
| 21632.04009 | 64111.36801 | 2.96372269 | 8.68E-05 | yes | Metabolism | Carbohydrate metabolism | Pentose and glucuronate interconversions |
| 35194.04518 | 47389.22165 | 1.3465125 | 0.002630994 | yes | Metabolism | Carbohydrate metabolism | Galactose metabolism |
| 35211.12678 | 45694.14295 | 1.29771885 | 0.003498821 | yes | Genetic Information Processing | Replication and repair | Base excision repair |
| 26208.94363 | 51439.83857 | 1.96268264 | 0.000476555 | yes | Metabolism | Lipid metabolism | Synthesis and degradation of ketone bodies |
| 29642.13413 | 48654.11079 | 1.64138353 | 5.29E-05 | yes | Metabolism | Carbohydrate metabolism | Starch and sucrose metabolism |
| 32921.30031 | 45859.6048 | 1.39300709 | 0.001809654 | yes | Metabolism | Nucleotide metabolism | Purine metabolism |
| 31301.03376 | 45771.85701 | 1.46231135 | 0.00251086 | yes | Metabolism | Metabolism of other amino acids | Taurine and hypotaurine metabolism |
| 27348.34713 | 48057.13391 | 1.75722261 | 0.00033526 | yes | Metabolism | Carbohydrate metabolism | Butanoate metabolism |
| 23185.84007 | 48131.36359 | 2.07589475 | 0.001173581 | yes | Environmental Information Processing | Membrane transport | Phosphotransferase system (PTS) |
| 10554.40019 | 55407.47929 | 5.24970423 | 4.20E-06 | yes | Cellular Processes | Cell motility | Flagellar assembly |
| 22899.64859 | 46334.96148 | 2.02339181 | 0.000105274 | yes | Metabolism | Carbohydrate metabolism | Glyoxylate and dicarboxylate metabolism |
| 29774.33388 | 41137.47622 | 1.3816422 | 0.005124453 | yes | Metabolism | Metabolism of cofactors and vitamins | Riboflavin metabolism |
| 24374.17016 | 44860.98186 | 1.8405132 | 0.000292423 | yes | Metabolism | Amino acid metabolism | Arginine and proline metabolism |
| 47223.5035 | 28510.06929 | 0.60372626 | 0.015449705 | yes | Metabolism | Lipid metabolism | Secondary bile acid biosynthesis |
| 25890.89941 | 43521.04258 | 1.68093977 | 6.47E-05 | yes | Metabolism | Metabolism of other amino acids | Cyanoamino acid metabolism |
| 29077.94347 | 40434.69551 | 1.39056242 | 0.004513724 | yes | Metabolism | Carbohydrate metabolism | Propanoate metabolism |
| 27043.66471 | 36146.86831 | 1.33661132 | 7.59E-05 | yes | Genetic Information Processing | Transcription | RNA polymerase |
| 19730.83102 | 39874.63693 | 2.02093044 | 0.000216459 | yes | Metabolism | Metabolism of other amino acids | beta-Alanine metabolism |
| 24752.79141 | 34535.42228 | 1.39521324 | 0.006407453 | yes | Metabolism | Lipid metabolism | Glycerophospholipid metabolism |
| 24494.17923 | 33860.2514 | 1.38237951 | 0.003096324 | yes | Metabolism | Energy metabolism | Nitrogen metabolism |
| 21717.586 | 35054.06939 | 1.61408682 | 0.003179888 | yes | Metabolism | Metabolism of cofactors and vitamins | Ubiquinone and other terpenoid-quinone biosynthesis |
| 20488.64655 | 32324.61977 | 1.57768448 | 0.001855186 | yes | Metabolism | Lipid metabolism | Fatty acid degradation |
| 19372.75054 | 32760.96684 | 1.69108495 | 0.000383929 | yes | Metabolism | Amino acid metabolism | Valine, leucine and isoleucine degradation |
| 23263.20685 | 29110.9926 | 1.25137488 | 0.006648028 | yes | Genetic Information Processing | Folding, sorting and degradation | RNA degradation |
| 10677.60325 | 37981.60571 | 3.5571284 | 0.000201894 | yes | Metabolism | Carbohydrate metabolism | Inositol phosphate metabolism |
| 11086.75422 | 36954.32339 | 3.33319587 | 0.000153502 | yes | Metabolism | Xenobiotics biodegradation and metabolism | Metabolism of xenobiotics by cytochrome P450 |
| 18630.33719 | 31294.39423 | 1.67975458 | 0.001399383 | yes | Metabolism | Xenobiotics biodegradation and metabolism | Chloroalkane and chloroalkene degradation |
| 13737.02191 | 34672.74323 | 2.52403639 | 0.000138734 | yes | Environmental Information Processing | Signal transduction | Two-component system |
| 11639.06495 | 35545.57115 | 3.05398856 | 0.00020524 | yes | Metabolism | Carbohydrate metabolism | Ascorbate and aldarate metabolism |
| 14591.64539 | 32112.92614 | 2.20077485 | 7.40E-05 | yes | Metabolism | Lipid metabolism | Biosynthesis of unsaturated fatty acids |
| 18107.84964 | 28645.52926 | 1.58193987 | 0.00140281 | yes | Metabolism | Xenobiotics biodegradation and metabolism | Toluene degradation |
| 18484.44053 | 27431.56795 | 1.48403561 | 0.004707363 | yes | Metabolism | Lipid metabolism | Glycerolipid metabolism |
| 20086.255 | 25404.13171 | 1.26475203 | 0.006364335 | yes | Metabolism | Metabolism of cofactors and vitamins | Porphyrin and chlorophyll metabolism |
| 14679.3338 | 27306.65935 | 1.86021108 | 0.000355151 | yes | Metabolism | Biosynthesis of other secondary metabolites | Tropane, piperidine and pyridine alkaloid biosynthesis |
| 17051.81127 | 25208.24847 | 1.4783326 | 0.000330749 | yes | Metabolism | Energy metabolism | Oxidative phosphorylation |
| 16295.34314 | 25454.21874 | 1.56205479 | 0.000514151 | yes | Metabolism | Energy metabolism | Methane metabolism |
| 12829.53508 | 27399.0437 | 2.13562249 | 0.000187684 | yes | Metabolism | Metabolism of terpenoids and polyketides | Geraniol degradation |
| 18096.93545 | 20860.89049 | 1.15273056 | 0.011418244 | yes | Metabolism | Energy metabolism | Photosynthesis |
| 12375.92956 | 24646.39426 | 1.99147823 | 0.000659242 | yes | Metabolism | Amino acid metabolism | Tryptophan metabolism |
| 13747.76235 | 22268.34938 | 1.61977992 | 0.000934634 | yes | Metabolism | Metabolism of terpenoids and polyketides | Polyketide sugar unit biosynthesis |
| 12406.02022 | 23137.85666 | 1.8650507 | 0.000316347 | yes | Metabolism | Amino acid metabolism | Tyrosine metabolism |
| 11018.2077 | 23472.13309 | 2.13030411 | 4.56E-05 | yes | Metabolism | Amino acid metabolism | Phenylalanine metabolism |
| 11593.56613 | 22061.35072 | 1.90289601 | 0.001729967 | yes | Metabolism | Amino acid metabolism | Lysine degradation |
| 5071.432895 | 24087.33179 | 4.74961067 | 2.93E-05 | yes | Metabolism | Xenobiotics biodegradation and metabolism | Styrene degradation |
| 11223.65736 | 19340.60704 | 1.72320006 | 0.00767566 | yes | Metabolism | Metabolism of terpenoids and polyketides | Limonene and pinene degradation |
| 2711.30719 | 24911.05768 | 9.18784038 | 4.09E-05 | yes | Metabolism | Xenobiotics biodegradation and metabolism | Fluorobenzoate degradation |
| 11523.46859 | 17696.18169 | 1.53566451 | 0.005392126 | yes | Metabolism | Xenobiotics biodegradation and metabolism | Dioxin degradation |
| 4078.0676 | 21711.35829 | 5.32393291 | 5.19E-05 | yes | Metabolism | Xenobiotics biodegradation and metabolism | Chlorocyclohexane and chlorobenzene degradation |
| 10211.81418 | 13996.85194 | 1.37065282 | 0.005805833 | yes | Cellular Processes | Transport and catabolism | Peroxisome |
| 6304.12746 | 16726.37521 | 2.65324191 | 7.06E-05 | yes | Cellular Processes | Cellular community - prokaryotes | Biofilm formation - Vibrio cholerae |
| 6981.70372 | 16039.47935 | 2.29735892 | 3.29E-06 | yes | Metabolism | Xenobiotics biodegradation and metabolism | Nitrotoluene degradation |
| 8825.67833 | 13731.27767 | 1.55583256 | 0.003072528 | yes | Metabolism | Xenobiotics biodegradation and metabolism | Benzoate degradation |
| 7799.948715 | 13650.17825 | 1.75003436 | 0.00023051 | yes | Metabolism | Xenobiotics biodegradation and metabolism | Aminobenzoate degradation |
| 3932.100095 | 15888.57986 | 4.04073637 | 0.000244689 | yes | Metabolism | Metabolism of terpenoids and polyketides | Biosynthesis of siderophore group nonribosomal peptides |
| 4019.73279 | 14887.16628 | 3.70352137 | 4.86E-06 | yes | Metabolism | Xenobiotics biodegradation and metabolism | Caprolactam degradation |
| 6297.287825 | 11963.31378 | 1.89975655 | 0.000212073 | yes | Metabolism | Metabolism of other amino acids | Phosphonate and phosphinate metabolism |
| 15555.345 | 4332.735 | 0.27853673 | 0.002667133 | yes | Metabolism | Metabolism of other amino acids | D-Arginine and D-ornithine metabolism |
| 5659.444855 | 10371.27496 | 1.83256048 | 3.29E-05 | yes | Organismal Systems | Environmental adaptation | Plant-pathogen interaction |
| 4806.9815 | 10920.86964 | 2.27187678 | 0.000110075 | yes | Metabolism | Xenobiotics biodegradation and metabolism | Xylene degradation |
| 15328.68316 | 1739.124379 | 0.11345556 | 0.000561625 | yes | Human Diseases | Infectious diseases | Staphylococcus aureus infection |
| 4572.18781 | 6785.690893 | 1.48412339 | 0.006623054 | yes | Metabolism | Metabolism of cofactors and vitamins | Retinol metabolism |
| 1677.84293 | 7463.733368 | 4.44841006 | 1.80E-06 | yes | Metabolism | Biosynthesis of other secondary metabolites | Penicillin and cephalosporin biosynthesis |
| 5376.09611 | 3400.785039 | 0.63257519 | 0.024334876 | yes | Metabolism | Lipid metabolism | Primary bile acid biosynthesis |
| 2607.401345 | 4723.670543 | 1.81163922 | 3.47E-05 | yes | Organismal Systems | Endocrine system | Insulin signaling pathway |
| 2438.08324 | 4073.663964 | 1.67084696 | 0.001026959 | yes | Genetic Information Processing | Translation | Ribosome biogenesis in eukaryotes |
| 1926.11128 | 2793.786971 | 1.45048056 | 0.002145627 | yes | Genetic Information Processing | Translation | RNA transport |
| 1582.000675 | 2698.183439 | 1.70555138 | 4.01E-06 | yes | Organismal Systems | Immune system | NOD-like receptor signaling pathway |
| 637.43642 | 2945.697161 | 4.62116231 | 4.33E-06 | yes | Metabolism | Xenobiotics biodegradation and metabolism | Polycyclic aromatic hydrocarbon degradation |
| 463.518475 | 2446.646293 | 5.27842238 | 3.97E-05 | yes | Human Diseases | Infectious diseases | African trypanosomiasis |
| 1093.93968 | 1444.752636 | 1.32068766 | 0.000149079 | yes | Genetic Information Processing | Folding, sorting and degradation | Protein processing in endoplasmic reticulum |
| 1449.28322 | 920.1693286 | 0.63491339 | 0.004173194 | yes | Organismal Systems | Digestive system | Protein digestion and absorption |
| 1391.18155 | 449.4262464 | 0.32305363 | 0.000143621 | yes | Human Diseases | Infectious diseases | Bacterial invasion of epithelial cells |
| 340.73659 | 697.9698929 | 2.04841486 | 0.028942254 | yes | Human Diseases | Cancers | Pathways in cancer |
| 539.112195 | 223.0114393 | 0.41366425 | 0.001429967 | yes | Human Diseases | Infectious diseases | Amoebiasis |
| 231.68842 | 43.12211071 | 0.18612113 | 0.000351186 | yes | Human Diseases | Immune diseases | Systemic lupus erythematosus |
| 184.068195 | 5.68375357 | 0.03087852 | 0.000714029 | yes | Cellular Processes | Transport and catabolism | Endocytosis |
| 0.873085 | 0.05493571 | 0.06292138 | 7.37E-05 | yes | Metabolism | Glycan biosynthesis and metabolism | Glycosylphosphatidylinositol(GPI)-anchor biosynthesis |

A total of 120 important functional pathways associated with CAP patients were identified. fold, log2 fold change.

| **Supplementary Table S3**. ROC analysis of 7 different metabolites between the two groups | | | | |
| --- | --- | --- | --- | --- |
| metabolites | sensitivity | specificity | Youden index | AUC |
| Choline | 0.5 | 0.9 | 0.4 | 0.721 |
| Pyrimidine | 0.714 | 1 | 0.714 | 0.888 |
| Oleic acid (d5) | 0.964 | 1 | 0.964 | 0.989 |
| N-Acetyl-a-neuraminic acid | 0.893 | 0.8 | 0.693 | 0.857 |
| Dimethyldisulfide | 0.857 | 1 | 0.857 | 0.964 |
| LPC(12:0/0:0) | 0.964 | 0.9 | 0.864 | 0.971 |
| PA(20:4/2:0) | 0.893 | 0.95 | 0.843 | 0.973 |

Detailed results of ROC analysis of 7 differential metabolites between the CAP group and the healthy control group. Youden index, a statistical indicator for evaluating the correctness of observations, is defined as the sum of sensitivity and specificity minus 1; AUC, Area Under Curve.

| **Supplementary Table S4**. Correlations between different metabolites and bacterial communities | | | |
| --- | --- | --- | --- |
| genus | metabolite | cor | p_value |
| Staphylococcus | Choline | -0.275075988 | 0.058460312 |
| Neisseria | Choline | -0.146113765 | 0.321708508 |
| Moraxella | Choline | -0.192211818 | 0.190594411 |
| Fusobacterium | Choline | -0.149370386 | 0.310922435 |
| Lautropia | Choline | -0.101428036 | 0.492736471 |
| Treponema_2 | Choline | -0.201413379 | 0.169825399 |
| Filifactor | Choline | -0.210683462 | 0.150612328 |
| Parvimonas | Choline | -0.014874328 | 0.920073276 |
| Aggregatibacter | Choline | -0.322220063 | 0.025515859 |
| Staphylococcus | Pyrimidine | -0.314589666 | 0.029427464 |
| Neisseria | Pyrimidine | -0.338145897 | 0.018738126 |
| Moraxella | Pyrimidine | -0.486470234 | 0.000455214 |
| Fusobacterium | Pyrimidine | -0.480785931 | 0.000542382 |
| Lautropia | Pyrimidine | -0.318455798 | 0.027387428 |
| Treponema_2 | Pyrimidine | -0.467735153 | 0.000801881 |
| Filifactor | Pyrimidine | -0.543835847 | 6.47E-05 |
| Parvimonas | Pyrimidine | -0.421529781 | 0.002846237 |
| Aggregatibacter | Pyrimidine | -0.430976173 | 0.002228048 |
| Staphylococcus | Oleic acid | -0.53343465 | 9.46E-05 |
| Neisseria | Oleic acid | -0.686821537 | 7.04E-08 |
| Moraxella | Oleic acid | -0.66391361 | 2.69E-07 |
| Fusobacterium | Oleic acid | -0.730026053 | 3.92E-09 |
| Lautropia | Oleic acid | -0.719498342 | 8.31E-09 |
| Treponema_2 | Oleic acid | -0.751490094 | 7.53E-10 |
| Filifactor | Oleic acid | -0.621573213 | 2.42E-06 |
| Parvimonas | Oleic acid | -0.631398955 | 1.50E-06 |
| Aggregatibacter | Oleic acid | -0.713205937 | 1.28E-08 |
| Staphylococcus | N-Acetyl-a-neuraminic acid | -0.559921841 | 3.50E-05 |
| Neisseria | N-Acetyl-a-neuraminic acid | -0.481980026 | 0.000522914 |
| Moraxella | N-Acetyl-a-neuraminic acid | -0.590626609 | 9.91E-06 |
| Fusobacterium | N-Acetyl-a-neuraminic acid | -0.495332175 | 0.00034429 |
| Lautropia | N-Acetyl-a-neuraminic acid | -0.432209403 | 0.002156836 |
| Treponema_2 | N-Acetyl-a-neuraminic acid | -0.548870647 | 5.36E-05 |
| Filifactor | N-Acetyl-a-neuraminic acid | -0.394549704 | 0.005519733 |
| Parvimonas | N-Acetyl-a-neuraminic acid | -0.383909673 | 0.007064756 |
| Aggregatibacter | N-Acetyl-a-neuraminic acid | -0.5859591 | 1.21E-05 |
| Staphylococcus | Dimethyldisulfide | -0.423143726 | 0.002730954 |
| Neisseria | Dimethyldisulfide | -0.518128528 | 0.000161925 |
| Moraxella | Dimethyldisulfide | -0.626825946 | 1.87E-06 |
| Fusobacterium | Dimethyldisulfide | -0.621580547 | 2.42E-06 |
| Lautropia | Dimethyldisulfide | -0.426453851 | 0.002507337 |
| Treponema_2 | Dimethyldisulfide | -0.652044294 | 5.15E-07 |
| Filifactor | Dimethyldisulfide | -0.652136158 | 5.13E-07 |
| Parvimonas | Dimethyldisulfide | -0.530752952 | 0.000104154 |
| Aggregatibacter | Dimethyldisulfide | -0.574087834 | 1.99E-05 |
| Staphylococcus | LPC(12:0/0:0) | 0.448545376 | 0.001386513 |
| Neisseria | LPC(12:0/0:0) | 0.545158489 | 6.16E-05 |
| Moraxella | LPC(12:0/0:0) | 0.644925614 | 7.51E-07 |
| Fusobacterium | LPC(12:0/0:0) | 0.647959184 | 6.40E-07 |
| Lautropia | LPC(12:0/0:0) | 0.453548385 | 0.001205712 |
| Treponema_2 | LPC(12:0/0:0) | 0.670464244 | 1.86E-07 |
| Filifactor | LPC(12:0/0:0) | 0.642527559 | 8.50E-07 |
| Parvimonas | LPC(12:0/0:0) | 0.538678689 | 7.82E-05 |
| Aggregatibacter | LPC(12:0/0:0) | 0.595040345 | 8.18E-06 |
| Staphylococcus | PA(20:4/2:0) | 0.46016066 | 0.000999143 |
| Neisseria | PA(20:4/2:0) | 0.537993921 | 8.02E-05 |
| Moraxella | PA(20:4/2:0) | 0.636708587 | 1.15E-06 |
| Fusobacterium | PA(20:4/2:0) | 0.642531481 | 8.50E-07 |
| Lautropia | PA(20:4/2:0) | 0.451593669 | 0.001273681 |
| Treponema_2 | PA(20:4/2:0) | 0.658074635 | 3.72E-07 |
| Filifactor | PA(20:4/2:0) | 0.626241798 | 1.93E-06 |
| Parvimonas | PA(20:4/2:0) | 0.522012927 | 0.000141629 |
| Aggregatibacter | PA(20:4/2:0) | 0.592523855 | 9.13E-06 |

Spearman's correlation analysis was used to evaluate the correlation between different metabolites and bacterial communities in CAP patients and healthy subjects.
